# Supplementary material
Source: publisher figshare collection journal article supplement (https://aacr.figshare.com/articles/dataset/_/23145124)
Supplement: Supplementary file 1 [file 40851418]

**Supplementary Table S11. Statistically significant associations between prediagnostic circulating levels of sex hormone and the risk of gastrointestinal cancer NOT included in meta-analysis**

| First author                    | Year | Sex                  | Sex hormone             | Cancer site                   | Comparisons                     | OR (95% CI)      |
|---------------------------------|------|----------------------|-------------------------|-------------------------------|---------------------------------|------------------|
| Jessica L. Petrick <sup>1</sup> | 2019 | Men                  | Dehydroepiandrosterone  | Gastric cardia adenocarcinoma | Highest vs. lowest quartiles    | 0.34 (0.14-0.81) |
| Jessica L. Petrick <sup>1</sup> | 2019 | Men                  | Free estradiol          | Gastric cardia adenocarcinoma | Highest vs. lowest quartiles    | 0.42 (0.21-0.86) |
| Jessica L. Petrick <sup>2</sup> | 2020 | Postmenopausal women | 4-androstenedione       | Total liver cancer            | Highest vs. lowest quartiles    | 0.27 (0.09-0.80) |
| Jessica L. Petrick <sup>2</sup> | 2020 | Postmenopausal women | Androstenedione/estrone | Total liver cancer            | Highest vs. lowest quartiles    | 0.27 (0.08-0.91) |
| Muktar Ahmed <sup>3</sup>       | 2023 | Men                  | Free estradiol          | Total liver cancer            | Per standard deviation increase | 2.54 (2.19-2.93) |
| Muktar Ahmed <sup>3</sup>       | 2023 | Men                  | Free estradiol          | Hepatocellular carcinoma      | Per standard deviation increase | 2.90 (2.43-3.47) |
| Muktar Ahmed <sup>3</sup>       | 2023 | Women                | Free estradiol          | Hepatocellular carcinoma      | Per standard deviation increase | 1.89 (1.42-2.50) |
| Muktar Ahmed <sup>3</sup>       | 2023 | Men                  | Free estradiol          | Cholangiocarcinoma            | Per standard deviation increase | 1.76 (1.14-2.70) |
| Muktar Ahmed <sup>3</sup>       | 2023 | Women                | Free estradiol          | Cholangiocarcinoma            | Per standard deviation increase | 0.60 (0.39-0.93) |

## References

1. Petrick JL, Hyland PL, Caron P, et al. Associations Between Prediagnostic Concentrations of Circulating Sex Steroid Hormones and Esophageal/Gastric Cardia Adenocarcinoma Among Men. *J Natl Cancer Inst* 2019;111(1):34–41.
2. Petrick JL, Florio AA, Zhang X, et al. Associations Between Prediagnostic Concentrations of Circulating Sex Steroid Hormones and Liver Cancer Among Postmenopausal Women. *Hepatology* 2020;72(2):535–47.
3. Ahmed M, Mäkinen V-P, Lumsden A, et al. Metabolic profile predicts incident cancer: A large-scale population study in the UK Biobank. *Metabolism* 2023;138:155342.
